# Supplementary material
Source: HighWire-hosted journal article supplement (https://bmjopen.bmj.com/content/12/2/e058834)
Supplement: inline-supplementary-material-1 [file inline-supplementary-material-1.pdf]

## Supplemental material 1

### Select Resource(s) to search:

|                                                                                              |
|----------------------------------------------------------------------------------------------|
| Trip Medical Database                                                                        |
| Agency for Healthcare Research and Quality (AHRQ)                                            |
| National Institute for Clinical excellence (NICE)                                            |
| New Zealand Guideline Group (NZGG)                                                           |
| Guidelines International Network (GIN)                                                       |
| Canadian Medical Association Clinical Practice Guidelines Database (CMACPG)                  |
| Australian clinical practice guidelines-National Health and Medical Research Council (NHMRC) |
| PubMed                                                                                       |
| Embase                                                                                       |

### Search strategy:

- #1 "guidelines as topic" [mesh]
- #2 "guideline" [pt]
- #3 guideline\* [tiab]
- #4 guidance [tiab]
- #5 recommendation\* [tiab]
- #6 consensus [tiab]
- #7 OR/#1~#6
- #8 "acupuncture therapy" [mesh]
- #9 Acup\* [tiab]
- #10 acupuncture [tiab]
- #11 body needling [tiab]
- #12 acupotomy [tiab]
- #13 electro-acupuncture [tiab]
- #14 needling [tiab]

- #15 thread-embedding therapy [tiab]
- #16 medicine acicula [tiab]
- #17 transcutaneous electrical nerve stimulation [tiab]
- #18 acupressure [tiab]
- #19 moxibustion,
- #20 blood-letting therapy
- #21 point injection
- #22 acupoint paste
- #23 OR/#8~#22
- #24 #7 AND #23
